# Supplementary material for: The Implementation of Improvement Interventions for "Low Performing" and "High Performing" Organisations in Health, Education and Local Government: A Phased Literature Review
Source: PubMed Central journal article supplement (PMC9808185; doi:10.34172/ijhpm.2020.197), 2020-11-01

### Supplementary file 3. Study Selection Procedure

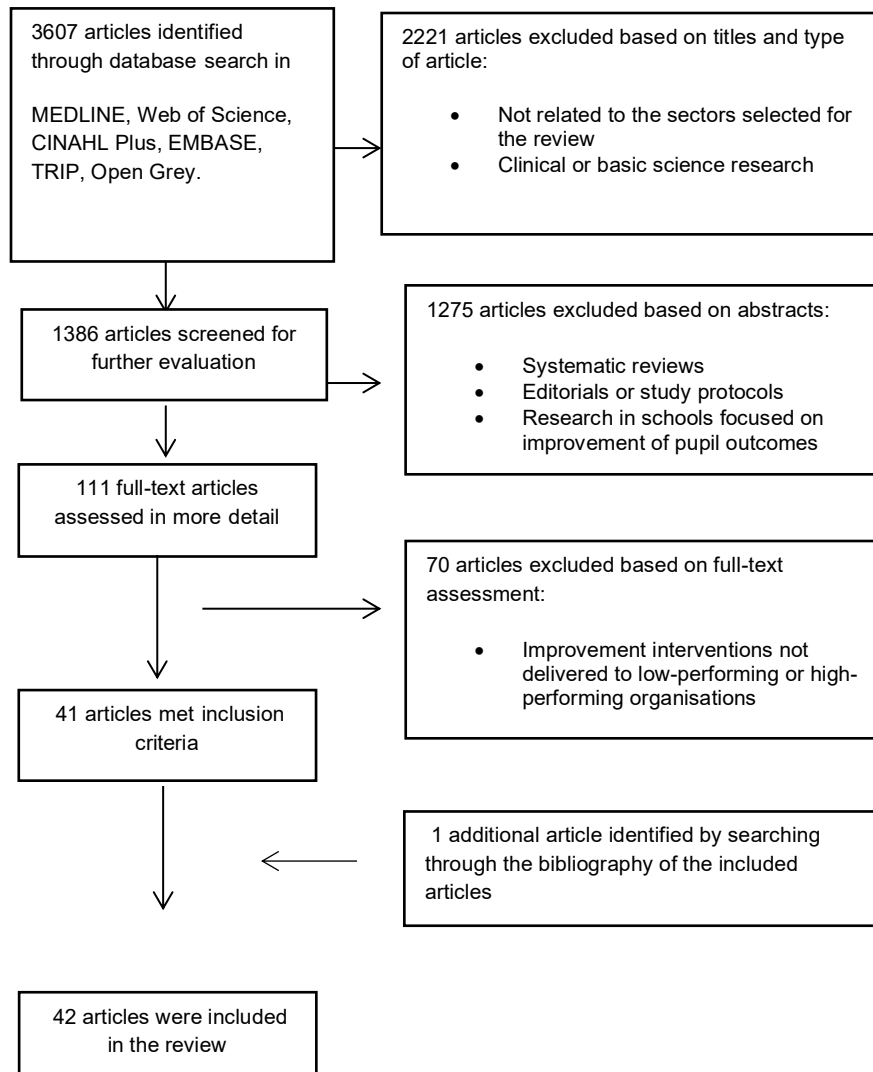

Supplement: ijhpm-11-874-s003.pdf [file ijhpm-11-874-s003.pdf]
