# Supplementary material for: The Implementation of Improvement Interventions for "Low Performing" and "High Performing" Organisations in Health, Education and Local Government: A Phased Literature Review
Source: PubMed Central journal article supplement (PMC9808185; doi:10.34172/ijhpm.2020.197), 2020-11-01
Supplement: ijhpm-11-874-s004.pdf [file ijhpm-11-874-s004.pdf]

**Supplementary file 4.** Characteristics of Studies Included in Phase 2 and Quality Assessment Results

| <b>First author surname</b> | <b>Year of publication</b> | <b>Country where the study took place</b> | <b>Sector where the study took place</b> | <b>Study design</b> | <b>Quality assessment *</b> |
|-----------------------------|----------------------------|-------------------------------------------|------------------------------------------|---------------------|-----------------------------|
| Beeri                       | 2009                       | UK                                        | LA                                       | Qualitative         | ***                         |
| Beeri                       | 2012                       | UK                                        | LA                                       | Mixed-methods       | ***                         |
| Beeri                       | 2013a, 2013b               | Israel                                    | LA                                       | Mixed-methods       | ***                         |
| Beeri                       | 2014                       | UK                                        | LA                                       | Quantitative        | **                          |
| Chapman                     | 2002                       | UK                                        | Schools                                  | Qualitative         | ***                         |
| Chapman                     | 2004                       | UK                                        | Schools                                  | Qualitative         | ***                         |
| Ehren                       | 2013                       | 6 European countries                      | Schools                                  | Qualitative         | ***                         |
| Finnigan                    | 2012                       | USA                                       | schools                                  | Mixed-methods       | **                          |
| Gorton                      | 2014                       | UK                                        | schools                                  | Qualitative         | ***                         |
| Heck                        | 2017                       | USA                                       | schools                                  | Quantitative        | ***                         |
| Rosenberg                   | 2015                       | USA                                       | schools                                  | Mixed-methods       | ***                         |
| Jas                         | 2005                       | UK                                        | LA                                       | Qualitative         | ***                         |
| Marsh                       | 2017                       | USA                                       | schools                                  | Qualitative         | ***                         |

|             |            |     |            |               |     |
|-------------|------------|-----|------------|---------------|-----|
| Meyers      | 2018       | USA | schools    | Mixed-methods | *** |
| Nicolaidou  | 2005       | UK  | schools    | Qualitative   | *** |
| Perryman    | 2005, 2006 | UK  | schools    | Qualitative   | *** |
| Mintrop     | 2007       | USA | Schools    | Quantitative  | **  |
| Parsons     | 2013       | UK  | schools    | Quantitative  | *** |
| Rice        | 2012       | USA | schools    | Qualitative   | *** |
| Orr         | 2008       | USA | schools    | Qualitative   | *** |
| Turner      | 2004       | UK  | LA         | Mixed-methods | **  |
| VanGronigen | 2019       | USA | schools    | Qualitative   | *** |
| Willis      | 2010       | UK  | Schools    | Qualitative   | *** |
| Wilmott     | 1999       | UK  | Schools    | Qualitative   | *** |
| Yapp        | 2007       | UK  | LA         | Qualitative   | *** |
| Chang       | 2018       | US  | healthcare | Qualitative   | *** |
| Rose        | 2012       | US  | Healthcare | Qualitative   | *** |
| Curry       | 2011       | US  | Healthcare | Qualitative   | *** |
| Mannion     | 2005       | UK  | Healthcare | Qualitative   | *** |
| Werner      | 2008       | US  | Healthcare | Quantitative  | *** |

|              |      |           |            |               |     |
|--------------|------|-----------|------------|---------------|-----|
| Tsai         | 2015 | US and UK | Healthcare | Quantitative  | *** |
| Hochman      | 2016 | US        | Healthcare | Qualitative   | *** |
| Gagliardi    | 2015 | Canada    | Healthcare | Qualitative   | *** |
| Aboumatar    | 2015 | US        | Healthcare | Quantitative  | *** |
| Brewster     | 2011 | US        | Healthcare | Qualitative   | *** |
| Mills        | 2008 | US        | Healthcare | Qualitative   | *** |
| Freed        | 2005 | US        | Healthcare | Qualitative   | *** |
| Allen        | 2019 | UK        | Healthcare | Quantitative  | *** |
| Boyd         | 2016 | UK        | Healthcare | Mixed-methods | *** |
| Castro-Avila | 2019 | UK        | Healthcare | Quantitative  | *** |

MMAT quality assessment categories range from \* (lowest) to \*\*\*\* (highest).
